# Supplementary material for: Depletion of CTCF in Breast Cancer Cells Selectively Induces Cancer Cell Death via p53
Source: PubMed Central journal article supplement — J Cancer. 2017 Jul 5;8(11):2124–31. doi: 10.7150/jca.18818 (PMC5559975; doi:10.7150/jca.18818), 2017-07-05

## Supplementary Materials

**Table S1.** Primers used in this work

| <i>For generating expression vector</i> |                           |                                            |
|-----------------------------------------|---------------------------|--------------------------------------------|
| CTCF                                    | forward                   | AGA AAG CTT ATG GAA GGT GAT GCA<br>GTC GAA |
|                                         | reverse                   | CTG CTC GAG TCA CCG GTC CAT CAT<br>GCT     |
| <i>For RT-PCR</i>                       |                           |                                            |
| CTCF                                    | forward                   | TGC GAA AGC AGC ATT CCT AT                 |
|                                         | reverse                   | TAG CGC TTG AAG TGC ATG                    |
| p53                                     | forward                   | TAA CAG TTC CTG CAT GGG CGG C              |
|                                         | reverse                   | AGG ACA GGC ACA AAC ACG CAC C              |
| p21                                     | forward                   | ACT GTG ATG CGC TAA TGG                    |
|                                         | reverse                   | GAC AGT GAC AGG TCC ACA                    |
| Bax                                     | forward                   | GTA ACA TGG AGC TGC AGA G                  |
|                                         | reverse                   | GAG GCT TGA GGA GTC TCA C                  |
| HOXA10                                  | forward                   | GGG GAC TTC TCT TCC AGT TTC                |
|                                         | reverse                   | GGG AGA ATT GTG GTG TGC TT                 |
| ATG13                                   | forward                   | GTG ATT GTC CAG GCT CGG                    |
|                                         | reverse                   | TCT CCA CAC ACA TGG ACC                    |
| p62                                     | forward                   | GAT TCG CCG CTT CAG CTT                    |
|                                         | reverse                   | TTC ACG TAG GAC ATG GCC                    |
| <i>For ChIP-PCR</i>                     |                           |                                            |
| p53-siteA                               | forward                   | CAT TGT TGT ATT CCT GAG TGC C              |
|                                         | reverse                   | GAG TCC CGC GGT AAT TCT T                  |
| p53-siteB                               | forward                   | AAG AAT TAC CGC GGG ACT C                  |
|                                         | reverse                   | TCG GTC CAC CTT CCG ATT                    |
| <i>For luciferase assay</i>             |                           |                                            |
| p53                                     | TP53-A- <i>KpnI</i> -F    | AGA GGT ACC AAG AAA CCC ACC TGT<br>GCT     |
|                                         | TP53-A- <i>HindIII</i> -R | AGA AAG CTT GGA GCT TAC CCA ATC<br>CAG G   |

**Figure S1.** Experimental time line for CTCF knockdown cells. The 7<sup>th</sup> day after the transduction and selection was designated as analysis Day 0 (D0). Cell proliferation was measured from Day 0 to Day 8. Characteristic features of apoptosis, cell cycle, and autophagy were examined at Day 2.

**Figure S2.** Effect of CTCF knockdown on cell proliferation of MCF10A cells. Cell proliferation was monitored by MTT assay in a time course experiment of MCF10A cells for the CTCF knockdown (KD1 and KD2) and control (non-specific [NS] and empty vector [pLKO]) group. Y-axis represents the mean value with standard error of the relative proliferation rate.

**Figure S3.** Optimization of MCF7-GFP and MCF10A co-culture. (A) mRNA expression of CTCF in parental MCF7 and independent homogenous clones stably expressing MCF7-GFP (MCF7-H1, -H2, and -H3), and hetero pools (MCF7-H-Het). (B) Bright field (BF) and green fluorescent (GFP) images of MCF7-GFP-H3 cells show that all the cells are expressing GFP. (C-D) Growth rate of MCF7-GFP and MCF10A cells in their own standard medium (C) and in optimized experimental medium (D). The optimized medium was used to grow MCF7-GFP/MCF10A for co-culture experiment to guarantee similar growth rate for two different cell lines. (E) FACS analysis of MCF7-GFP cell lines (MCF7-GFP-H1, -H2, -H3, and -Het) to confirm GFP expression. (F) MCF-7-GFP/MCF10A co-culture in optimized experimental media. BF, GFP, and merged images were presented.

**Figure S4.** CTCF and H3K4me3 ChIP-seq signal in *TP53* locus. Data from the ENCODE project are displayed as custom annotation tracks in the UCSC genome browser. The conserved CTCF binding site (PMID: 24614316) was found within a genomic region containing CpG island where strong binding of CTCF was detected with high ChIP-seq peak.

**Figure S5.** Effects of siRNA-mediated knockdown of CTCF on cell proliferation in T47D breast cancer cells. The siRNA against human CTCF (on-target plus smart pool) were purchased from Dharmacon (L-02165-00-0005). After siCon or siCTCF transfection for 48 hours, cell proliferation was measured by Cell Counting Kit-8 (CCK-8; Dojindo Laboratories, Kumamoto, Japan) at Day 1 and Day 3. mRNA expression of *CTCF* in CTCF knockdown (siCTCF) and control (siCon) cells was determined by RT-PCR. \* $p < 0.05$ ; \*\* $p < 0.01$ ; vs. siCon, by t-test

**Figure S6.** Expression and localization of ITGB4 in MCF-7 cells. (A) mRNA expression level of *ITGB4* and *CTCF* in control non-specific (Control-NS) and CTCF-knockdown (CTCF-KD) cells. (B) Confocal microscopy images showing ITGB4 and p53 in Control-NS and CTCF-KD cells. Antibodies against p53 (sc-126; Santa Cruz), ITGB4 (ab133682; Abcam) and the corresponding secondary antibodies (anti-rabbit IgG Alexa Fluor 594 and anti-goat IgG Alexa Fluor 488; Invitrogen) were used for detection. Cells were counter stained with DAPI (Invitrogen) and analyzed using a Zeiss LSM700 confocal microscope. Zoomed images of square boxes in c and g are shown in i-l and m-p, respectively. Primer sequences for ITGB4 are as follows: forward; 5'- TGA GCC ACT GGA GAG CC-3', reverse; 5'- TCA TGT CCG TCT GCG GG-3'.

Figure S1

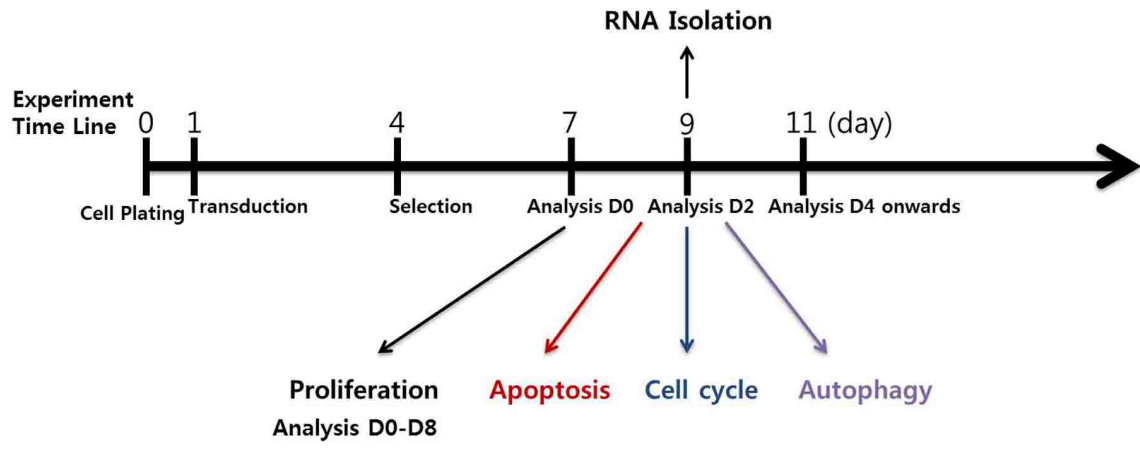

Figure S2

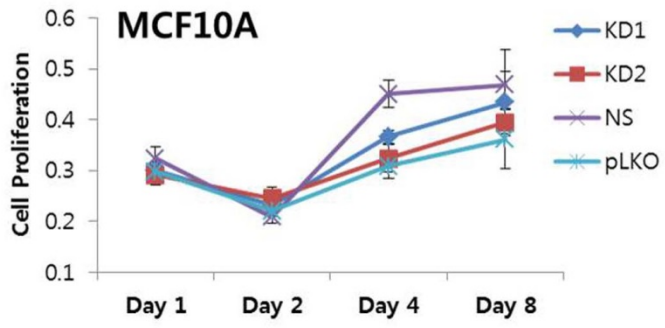

Figure S3

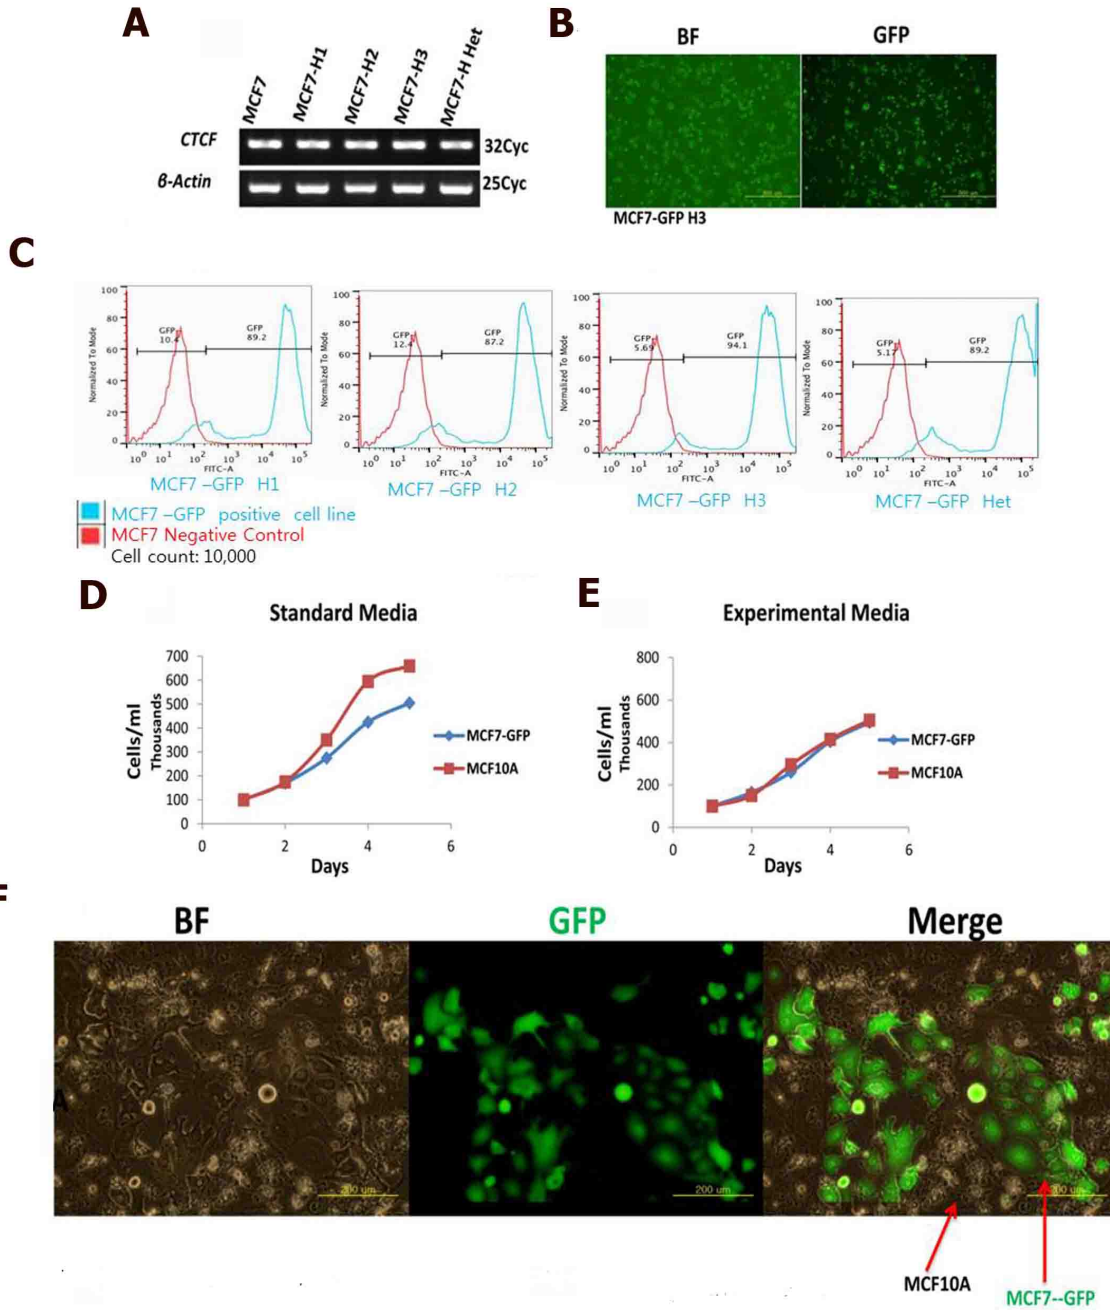

Figure S4

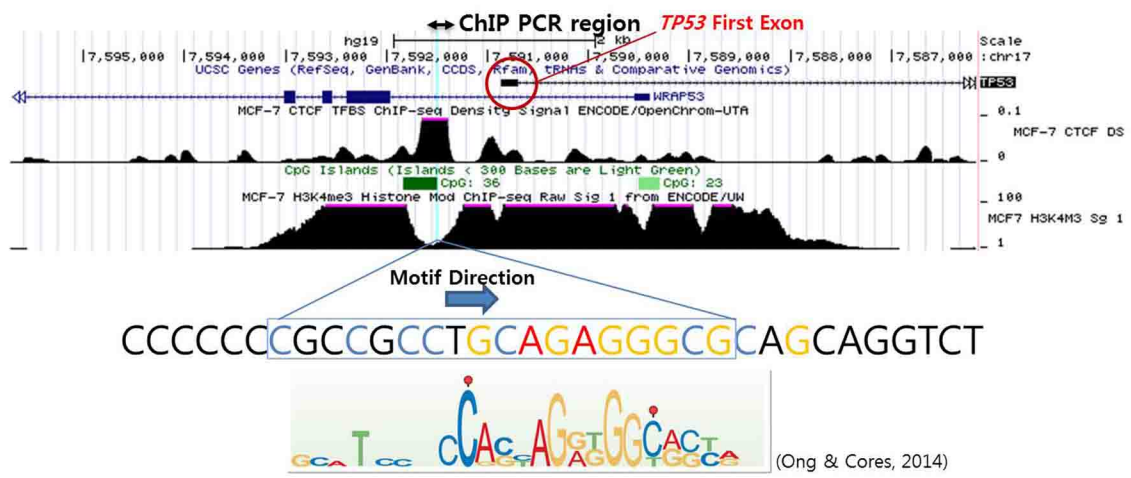

Figure S5

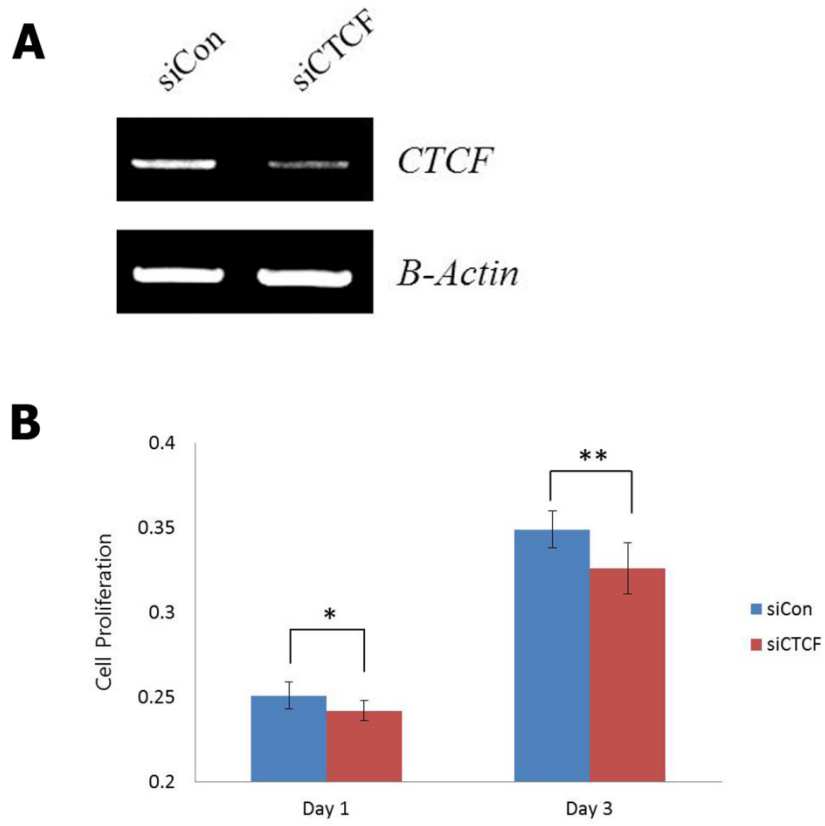



Figure S6

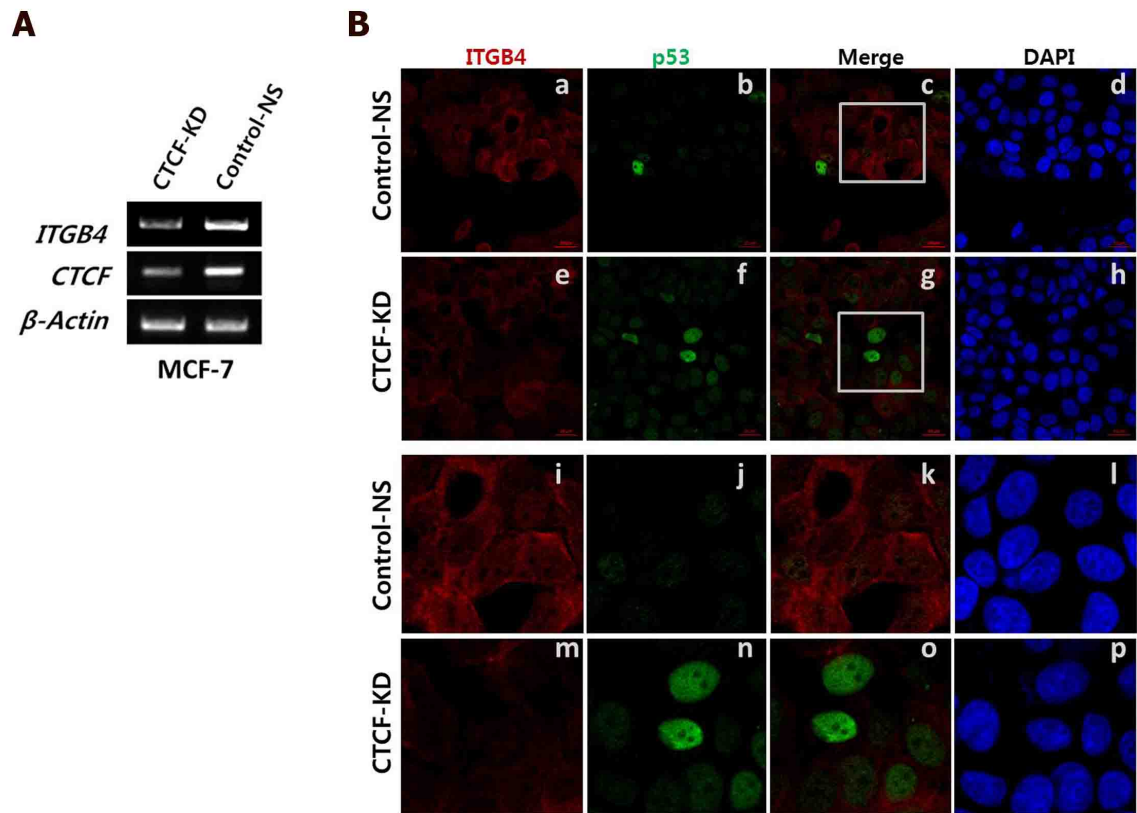

Supplement: jcav08p2124s1.pdf [file jcav08p2124s1.pdf]
